# Supplementary material
Source: publisher site journal article supplement (http://www.degruyter.com/publication/journal_key/BIOL/downloadAsset/BIOL_EACR%20AACR%20IACR%20How%20to%20Bring%20Basic%20Science%20Discoveries%20to%20the%20Clinic%202024.pdf)
Supplement: Supplementary file 1 [file BIOL_EACR%20AACR%20IACR%20How%20to%20Bring%20Basic%20Science%20Discoveries%20to%20the%20Clinic%202024.pdf]

# EACR-AACR-IACR

## HOW TO BRING BASIC SCIENCE DISCOVERIES TO THE CLINIC

27 - 29 Feb 2024 | Dublin, Ireland

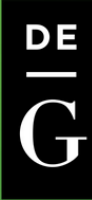

**EACR**  
European Association  
for Cancer Research

**AACR**  
American Association  
for Cancer Research\*

 **IACR**  
IRISH ASSOCIATION FOR CANCER RESEARCH

### **Short description:**

Cancer is caused by a complex interaction between inherited genetics, acquired somatic mutations, epigenetic changes and environmental factors. Genetic and epigenetic changes alter the competitive fitness of normal, stem and/ or progenitor cells giving them the ability to grow uncontrollably and spread. However, cancers develop in complex tissue environments, which they depend upon for progression and metastasis and cancer development is further modulated by the immune response. Understanding how reciprocal communication between cancer cells, the immune and stromal cells controls tumour development and modulates the response to therapeutic intervention is key for progressing cancer care. Moreover, a series of new, exciting studies have recently investigated the effects of conventional chemotherapy and immunotherapy uncovering unanticipated additional modes of action and unforeseen cellular effects. Altogether this opens novel opportunities for mechanism-based combinations, the discovery of novel drug targets and the development of new drugs.

### **Topics to be covered:**

- Immunotherapy / Immuno-Oncology
- Cell Based Therapies
- Novel Targets / Undruggable Targets
- Drug Combinations
- Drug Resistance
- The Precancer Genome
- Liquid Biopsies
- Preclinical Models
- Tumour Microenvironment
- Epigenetics

**EARLY  
REGISTRATION  
DEADLINE:  
06/12/2023**

**EACR**  
European Association  
for Cancer Research

**PROMOTIONAL PARTNER:**

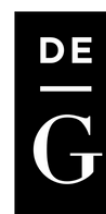

**DE GRUYTER**

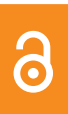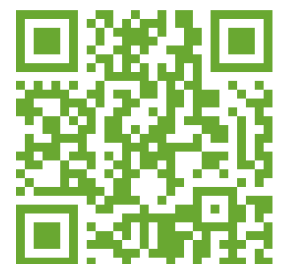

**REGISTER HERE**

[degruyter.com/biol](https://degruyter.com/biol)

EACR-AACR-IACR

# HOW TO BRING BASIC SCIENCE DISCOVERIES TO THE CLINIC

27 - 29 Feb 2024 | Dublin, Ireland

DE  
G

EACR

European Association  
for Cancer Research

AACR

American Association  
for Cancer Research\*

IACR  
IRISH ASSOCIATION FOR CANCER RESEARCH

As a promotional partner of this meeting, De Gruyter's Open Access journal, Open Life Sciences, offers all participants a 30% discount for Article Processing Charges, for all manuscripts submitted before March 31st, 2024.

## How to submit

Authors are kindly invited to submit their contribution via online submission system Editorial Manager available at:

<https://www.editorialmanager.com/openbiol/default1.aspx>

SUBMISSION  
DEADLINE:

31/03/2024

Please remember to select: SI: How To Bring Basic Science Discoveries To The Clinic to ensure that your manuscript is processed with the highest priority and that discount is applied.

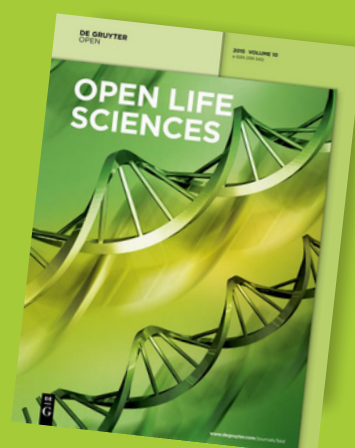

PROMOTIONAL PARTNER

EACR

European Association  
for Cancer Research

DE  
G

DE GRUYTER

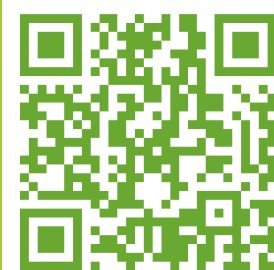

REGISTER HERE

[degruyter.com/biol](https://degruyter.com/biol)
